CORRECTION

# Correction: Evaluation of Intradural Stimulation Efficiency and Selectivity in a Computational Model of Spinal Cord Stimulation

The *PLOS ONE* Staff

The Data Availability statement for this paper is incorrect. The correct statement is: The authors confirm that all data underlying the findings are fully available without restriction. All relevant data are deposited in the Harvard Dataverse Network, with the DOI:[10.7910/DVN/29236](https://doi.org/10.7910/DVN/29236).

## Reference

1. Howell B, Lad SP, Grill WM (2014) Evaluation of Intradural Stimulation Efficiency and Selectivity in a Computational Model of Spinal Cord Stimulation. *PLoS ONE* 9(12): e114938. doi: [10.1371/journal.pone.0114938](https://doi.org/10.1371/journal.pone.0114938) PMID: [25536035](https://pubmed.ncbi.nlm.nih.gov/25536035/)

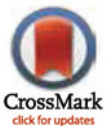

## OPEN ACCESS

**Citation:** The *PLOS ONE* Staff (2015) Correction: Evaluation of Intradural Stimulation Efficiency and Selectivity in a Computational Model of Spinal Cord Stimulation. *PLoS ONE* 10(4): e0123485. doi:[10.1371/journal.pone.0123485](https://doi.org/10.1371/journal.pone.0123485)

**Published:** April 7, 2015

**Copyright:** © 2015 The PLOS ONE Staff. This is an open access article distributed under the terms of the [Creative Commons Attribution License](https://creativecommons.org/licenses/by/4.0/), which permits unrestricted use, distribution, and reproduction in any medium, provided the original author and source are credited.
